# Supplementary material for: Analysis of Chemically Labile Glycation Adducts in Seed Proteins: Case Study of Methylglyoxal-Derived Hydroimidazolone 1 (MG-H1)
Source: Preprints.org preprint supplement (doi:10.20944/preprints201812.0126.v1), 2018-12-11
Supplement: Supplementary file 1 [file supplementary]

## **Analysis of chemically labile glycation adducts in seed proteins: a case study of methylglyoxal-derived hydroimidazolone 1 (MG-H1)**

Kristina Antonova,<sup>1,2§</sup> Maria Vikhnina,<sup>1,2§</sup> Alena Soboleva,<sup>1,2</sup> Tahir Mehmood,<sup>1</sup> Marie-Louise Heymich,<sup>3</sup> Tatiana Leonova,<sup>2</sup> Mikhail Bankin,<sup>4</sup> Elena Lukasheva,<sup>2</sup> Sabrina Gensberger-Reigl,<sup>3</sup> Sergei Medvedev,<sup>4</sup> Galina Smolikova,<sup>4</sup> Monika Pischetsrieder<sup>3</sup> and Andrej Frolov<sup>1,2</sup>

### **Supplementary information**

<sup>1</sup>Department of Bioorganic Chemistry, Leibniz Institute of Plant Biochemistry, <sup>2</sup>Department of Biochemistry, St. Petersburg State University, <sup>3</sup>Department of Food Chemistry, Universität Erlangen-Nürnberg, and <sup>4</sup>Department of Plant Physiology and Biochemistry, St. Petersburg State University,

<sup>§</sup>These authors contributed equally in the manuscript

\*Corresponding author:

Dr. Andrej Frolov

Leibniz Institute of Plant Biochemistry

Department of Bioorganic Chemistry

Weinberg 3, 06120

Halle/Saale, Germany

Tel. +49(0)34555821350

Fax. +49(0)34555821309

## Directory

|                                                                                                                                                     |       |
|-----------------------------------------------------------------------------------------------------------------------------------------------------|-------|
| <b>Protocols</b> .....                                                                                                                              | S1-3  |
| <b>Protocol S-1</b> Solid phase extraction on CHROMABOND HR-XAW weak cation exchanger cartridges.....                                               | S1-3  |
| <b>Protocol S-2</b> Solid phase extraction on CHROMABOND HR-XA strong cation exchanger cartridges.....                                              | S1-4  |
| <b>Protocol S-3</b> Solid phase extraction on CHROMABOND C18 reversed phase cartridges..                                                            | S1-5  |
| <b>Tables</b> .....                                                                                                                                 | S1-6  |
| <b>Table S-1</b> Protein recoveries and total UV densities calculated for individual pea samples separated by SDS-PAGE.....                         | S1-6  |
| <b>Table S-2</b> Protein recoveries and total UV densities calculated for individual oilseed rape samples separated by SDS-PAGE.....                | S1-7  |
| <b>Table S-3</b> Instrument settings applied for Orbitrap-LIT-MS and MS/MS experiments.....                                                         | S1-8  |
| <b>Figures</b> .....                                                                                                                                | S1-9  |
| <b>Figure S-1</b> Optimization of protein yield in respect of seed material amounts, taken for phenol extraction.....                               | S1-9  |
| <b>Figure S-2</b> SDS-PAGE electropherograms of glycated bovine serum albumin (BSA), before and after individual steps of enzymatic hydrolysis..... | S1-11 |
| <b>Figure S-3</b> SDS-PAGE electropherograms of glycated bovine serum albumin, before and after individual steps of enzymatic hydrolysis.....       | S1-13 |
| <b>Figure S-4</b> ESI-QqTOF-MS, acquired for enzymatic hydrolysate of pea protein.....                                                              | S1-14 |
| <b>Figure S-5</b> Recovery of three basic amino acids in SPE procedures, performed with different CHROMABOND cartridges.....                        | S1-15 |
| <b>Figure S-6</b> Recovery (%) of $N^{\epsilon}$ -(carboxymethyl)lysine and lysine on CHROMABOND C18 and C18 ec reversed phase cartridges.....      | S1-16 |

## Protocols

**Protocol S-1** Solid phase extraction (SPE) procedure for CHROMABOND HR-XAW weak anion exchanger cartridges

### *Materials:*

SPE cartridges: CHROMABOND HR-XA, 200 mg of material, designed for 3 ml load volume

Conditioning solution: methanol (LC-MS grade)

Equilibration solution: water

Eluent 1: 0.1 mol/L NaOH in water (MilliQ)

Eluent 2: methanol (LC-MS grade)

Eluent 3: 1% (v/v) aq. formic acid (LC-MS grade) in methanol (LC-MS grade)

Eluent 4: 5% (v/v) aq. formic acid (LC-MS grade) in methanol (LC-MS grade)

Eluent 5: 10% (v/v) aq. formic acid (LC-MS grade) in methanol (LC-MS grade)

Sample aspiration: the mixture of 146.2  $\mu\text{mol}$  lysine, 1.15  $\mu\text{mol}$  arginine and 1.29  $\mu\text{mol}$  histidine in 1 mL of phosphate buffered saline (PBS) adjusted to pH 10.0 with 25% ammonia solution

Elution – vacuum-driven, 800-900 mbar

### *Procedure:*

| # | Step              | Applied solution                | Volume (mL) |
|---|-------------------|---------------------------------|-------------|
| 1 | Conditioning      | Conditioning solution           | 5           |
| 2 | Equilibration     | Equilibration solution          | 5           |
| 3 | Sample aspiration | 1 mL of PBS adjusted to pH 10.0 | 1           |
| 4 | Elution 1         | Eluent 1                        | 5           |
| 5 | Elution 2         | Eluent 2                        | 2           |
| 6 | Elution 3         | Eluent 3                        | 4           |

|   |           |          |   |
|---|-----------|----------|---|
| 7 | Elution 4 | Eluent 4 | 4 |
| 8 | Elution 5 | Eluent 5 | 4 |

**Protocol S-2** Solid phase extraction (SPE) procedure for CHROMABOND HR-XA weak anion exchanger cartridges

**Materials:**

SPE cartridges: CHROMABOND HR-XA, 200 mg of material, 3 ml load volume

Conditioning solution: methanol (LC-MS grade)

Equilibration solution: water

Eluent 1: methanol (LC-MS grade)

Eluent 2: water (MilliQ)

Eluent 3: 0.1 mol/L NaOH in water (MilliQ)

Eluent 4: methanol (LC-MS grade)

Eluent 5: 1% (v/v) aq. formic acid (LC-MS grade) in methanol (LC-MS grade)

Eluent 6: 5% (v/v) aq. formic acid (LC-MS grade) in methanol (LC-MS grade)

Eluent 7: 10% (v/v) aq. formic acid (LC-MS grade) in methanol (LC-MS grade)

Sample aspiration: the mixture of 146.2  $\mu\text{mol}$  lysine, 1.15  $\mu\text{mol}$  arginine and 1.29  $\mu\text{mol}$  histidine in 1 mL of phosphate buffered saline (PBS) adjusted to pH 10.0 with 25% ammonia

Elution – vacuum-driven, 800-900 mbar

**Procedure:**

| # | Step              | Applied solution                | Volume (mL) |
|---|-------------------|---------------------------------|-------------|
| 1 | Conditioning      | Conditioning solution           | 5           |
| 2 | Equilibration     | Equilibration solution          | 5           |
| 3 | Sample aspiration | 1 mL of PBS adjusted to pH 10.0 | 1           |
| 4 | Elution 1         | Eluent 1                        | 5           |
| 5 | Elution 2         | Eluent 2                        | 5           |
| 6 | Elution 3         | Eluent 3                        | 5           |
| 7 | Elution 4         | Eluent 4                        | 2           |

|    |           |          |   |
|----|-----------|----------|---|
| 8  | Elution 5 | Eluent 5 | 4 |
| 9  | Elution 6 | Eluent 6 | 4 |
| 10 | Elution 7 | Eluent 5 | 4 |

**Protocol S-3** Solid phase extraction (SPE) procedure for CHROMABOND C18 reversed phase (RP) cartridges

**Materials:**

SPE cartridges: CHROMABOND C18 reversed phase (RP), 200 mg of material, 3 ml load

Conditioning solution: methanol (LC-MS grade)

Equilibration solution: water

Eluent 1: methanol (LC-MS grade)

Eluent 2: water (MilliQ)

Eluent 3: 0.25 mol/L ammonium acetate (LC-MS grade) in water (MilliQ)

Eluent 4: 0.1 mol/L ammonia (LC-MS grade) in water (MilliQ)

Eluent 5: 1% (v/v) ammonia (LC-MS grade), aq. 10 % (v/v) acetonitrile (LC-MS grade)

Eluent 6: 1% (v/v) ammonia (LC-MS grade), aq. 20 % (v/v) acetonitrile (LC-MS grade)

Eluent 7: 1% (v/v) ammonia (LC-MS grade), aq. 40 % (v/v) acetonitrile (LC-MS grade)

Sample aspiration: the mixture of 146.2  $\mu$ mol lysine, 1.15  $\mu$ mol arginine and 1.29  $\mu$ mol histidine in 1 mL of phosphate buffered saline (PBS) adjusted to pH 10.0 with 25% ammonia

Elution – vacuum-driven, 800-900 mbar

**Procedure:**

| # | Step              | Applied solution                | Volume (mL) |
|---|-------------------|---------------------------------|-------------|
| 1 | Conditioning      | Conditioning solution           | 5           |
| 2 | Equilibration     | Equilibration solution          | 5           |
| 3 | Sample aspiration | 1 mL of PBS adjusted to pH 10.0 | 1           |
| 4 | Elution 1         | Eluent 1                        | 5           |
| 5 | Elution 2         | Eluent 2                        | 5           |
| 6 | Elution 3         | Eluent 3                        | 5           |

|    |           |          |   |
|----|-----------|----------|---|
| 7  | Elution 4 | Eluent 4 | 5 |
| 8  | Elution 5 | Eluent 5 | 4 |
| 9  | Elution 6 | Eluent 6 | 4 |
| 10 | Elution 7 | Eluent 5 | 4 |

## Tables

**Table S-1** Protein recoveries and total UV densities calculated for individual pea samples separated by SDS-PAGE

| Sample      | Sample weight (mg) | Protein concentration (mg/mL) | Protein recovery (mg/g fresh weight) | UV densities (AU) <sup>a</sup> |
|-------------|--------------------|-------------------------------|--------------------------------------|--------------------------------|
| Pea-1       | 49.5               | 38.1                          | 96.2                                 | 38200                          |
| Pea-2       | 50.4               | 39.3                          | 97.5                                 | 36200                          |
| Pea-3       | 51.6               | 42.4                          | 102.8                                | 34100                          |
| Pea-AA-5d-1 | 51.4               | 32.8                          | 87.8                                 | 34100                          |
| Pea-AA-5d-2 | 50.3               | 54.9                          | 129.8                                | 35500                          |
| Pea-AA-5d-3 | 50.3               | 35.1                          | 91.6                                 | 38000                          |

Pea and Pea-AA-5d denote the seeds of yellow-seeded cultivar Millennium before and after accelerated ageing (AA) during five days, respectively; AU, arbitrary units

**Table S-2** Protein recoveries and total UV densities calculated for individual oilseed rape samples separated by SDS-PAGE

| <b>Sample</b> | <b>Sample weight (mg)</b> | <b>Protein concentration (mg/mL)</b> | <b>Protein recovery (mg/g fresh weight)</b> | <b>UV densities (AU)<sup>a</sup></b> |
|---------------|---------------------------|--------------------------------------|---------------------------------------------|--------------------------------------|
| Brassica-1    | 209.4                     | 73,93                                | 103,50                                      | 29315                                |
| Brassica-2    | 204.7                     | 77,34                                | 108,28                                      | 28814                                |
| Brassica-3    | 213.1                     | 70,42                                | 98,59                                       | 28361                                |
| Brassica-4    | 209.7                     | 68,64                                | 96,10                                       | 28075                                |
| Brassica-5    | 210.2                     | 85,31                                | 119,44                                      | 28361                                |
| Brassica-NA-1 | 211.5                     | 58,64                                | 82,10                                       | 28326                                |
| Brassica-NA-2 | 212.9                     | 38,50                                | 53,90                                       | 28837                                |
| Brassica-NA-3 | 203.6                     | 58,67                                | 82,14                                       | 29695                                |
| Brassica-NA-4 | 207.3                     | 67,46                                | 94,44                                       | 30906                                |
| Brassica-NA-5 | 207.2                     | 80,31                                | 112,44                                      | 30126                                |

Brassica and Brassica-NA denote the seeds of the oilseed rape cultivar Oredezh-2 (K-4917)

after one and nine years of natural ageing (dark, 18° C), respectively; AU, arbitrary units

**Table S-3** Instrument settings applied for Orbitrap-LIT-MS and MS/MS experiments

| Parameter                            | Setting                          |
|--------------------------------------|----------------------------------|
| MS conditions                        |                                  |
| Ionization mode                      | Positive                         |
| Mass analyzer                        | LIT-Orbitrap (FT-scan)           |
| Ion spray voltage (IS)               | 4.0 kV                           |
| Nebulizer gas                        | 35 psig                          |
| Auxillary gas                        | 30 psig                          |
| Capillary temperature                | 275 °C                           |
| Mass to charge ratio ( $m/z$ ) range | 400 – 2000                       |
| Resolution                           | 30000                            |
| MS/MS conditions                     |                                  |
| Ionization mode                      | Positive                         |
| Mass analyzer                        | LIT-Orbitrap (FT-scan)           |
| Ion spray voltage (IS)               | 4.0 kV                           |
| Fragmentation                        | Collision activated dissociation |
| Isolation width                      | 2 Da                             |
| Charge state rejected                | 1+                               |
| Normalized collision energy          | 35%                              |
| Activation frequency                 | 0.25                             |
| Activation time                      | 10 ms                            |



## Figures

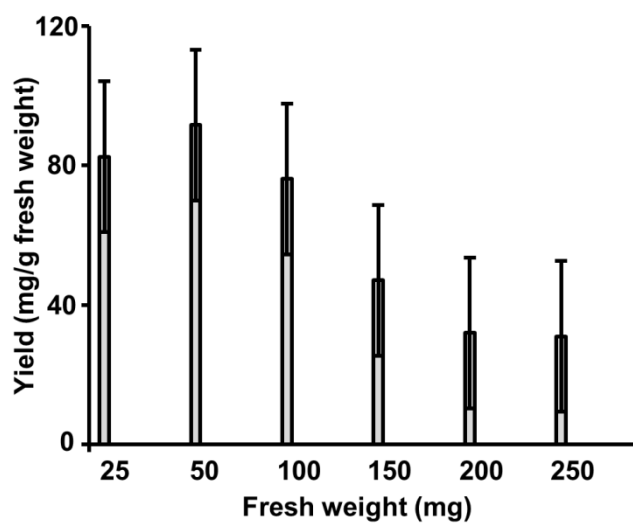

**Figure S-1** Optimization of protein yield in respect of seed material amounts, taken for phenol extraction

A

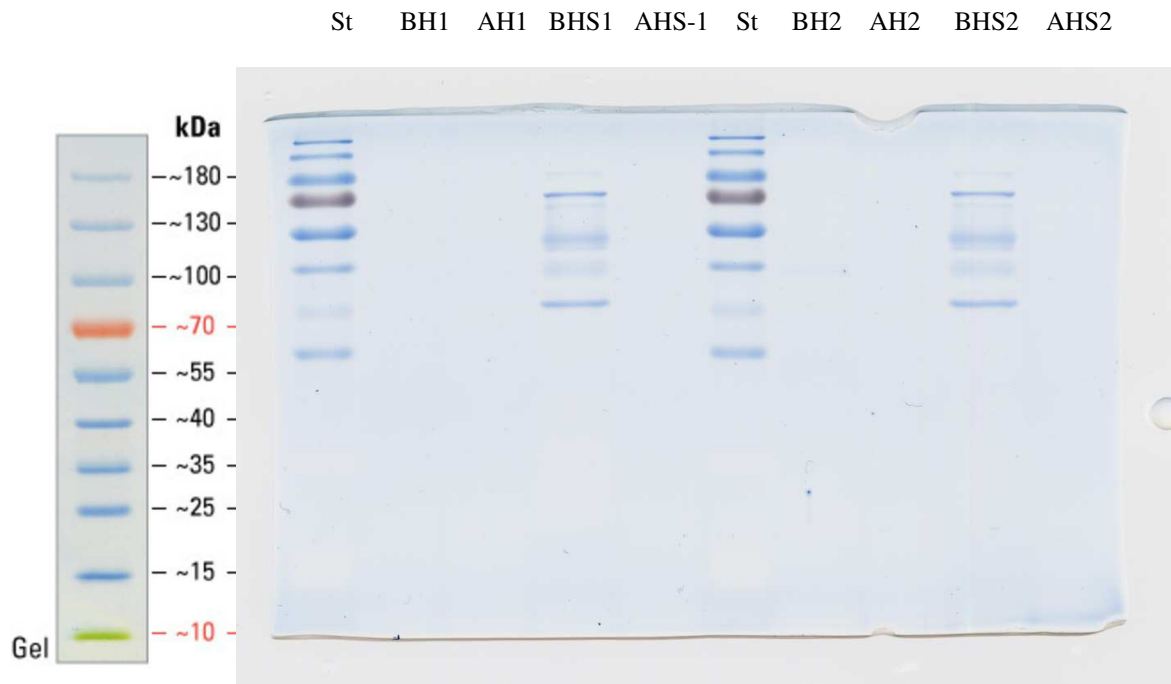

B

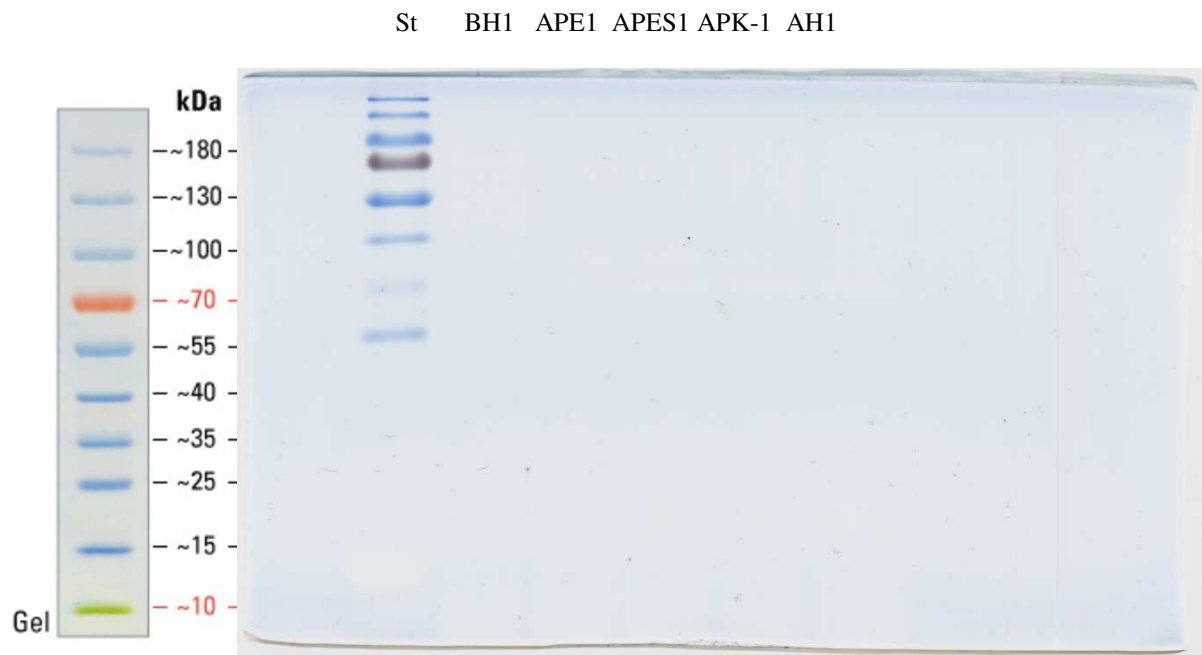

C

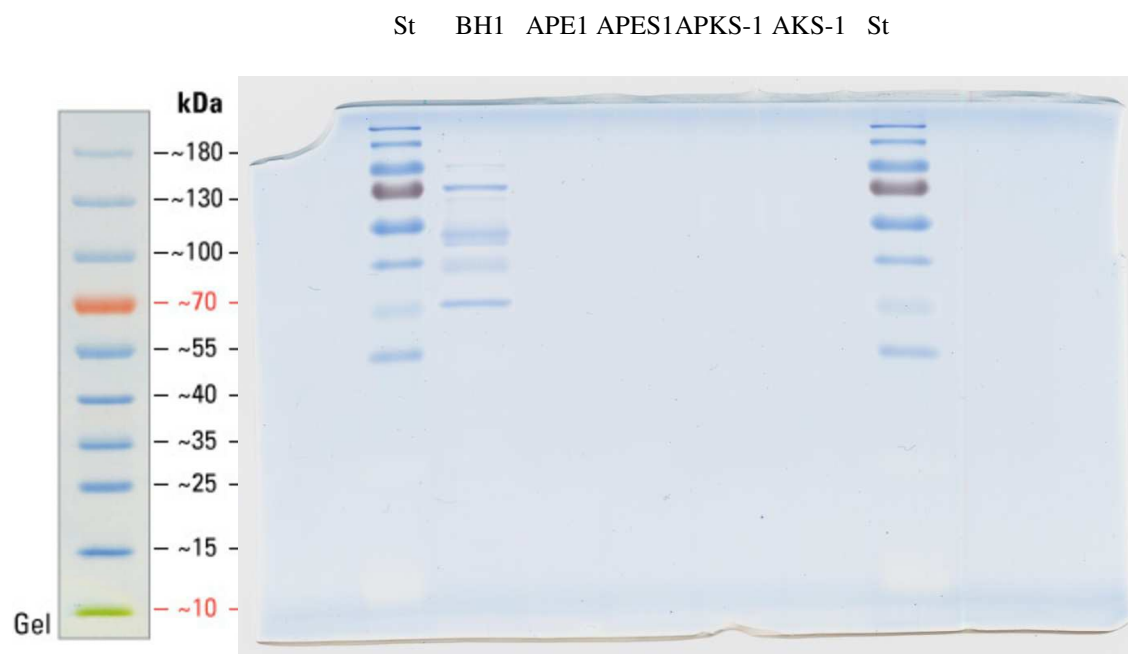

**Figure S-2** SDS-PAGE electropherograms of glycosylated bovine serum albumin (BSA), before and after individual steps of enzymatic hydrolysis. Hydrolysis was performed in triplicates. The aliquots (5  $\mu$ g) of all samples were loaded on a gel in 10  $\mu$ L of sample buffer. BH, before hydrolysis; APE, after incubation with Pronase E; APK, after incubation with Proteinase K; AH, after complete hydrolysis; BHS, before hydrolysis in presence of 0.5% (w/v) SDS; APES, after incubation with Pronase E in presence of 0.5% (w/v) SDS; APK, after incubation with Proteinase K in presence of 0.5% (w/v) SDS; AH, after complete hydrolysis in presence of 0.5% (w/v) SDS; St, Page Ruler Prestained Protein Ladder

A

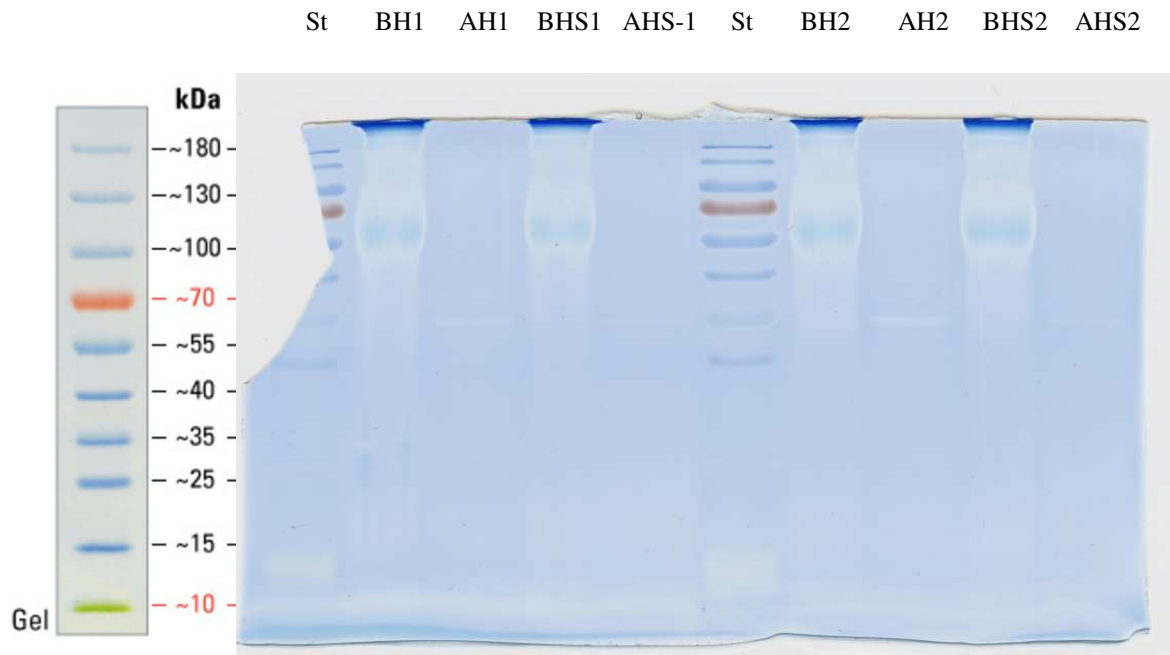

B

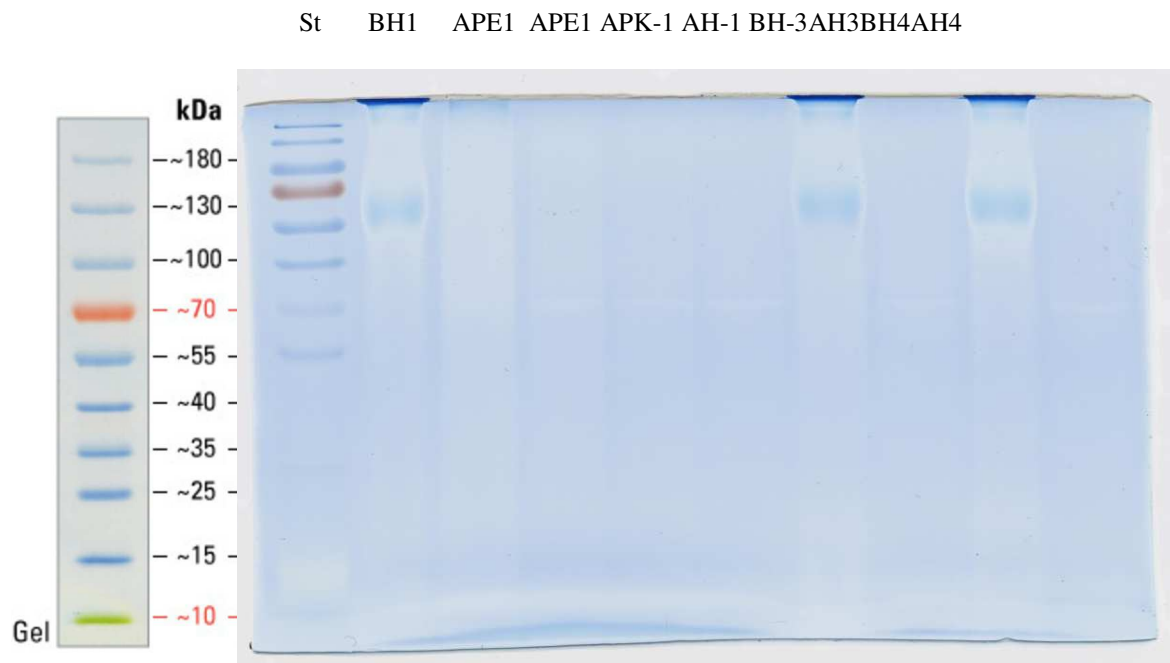

C

St BHS1 APES1 APES1 APKS-1AHS-1

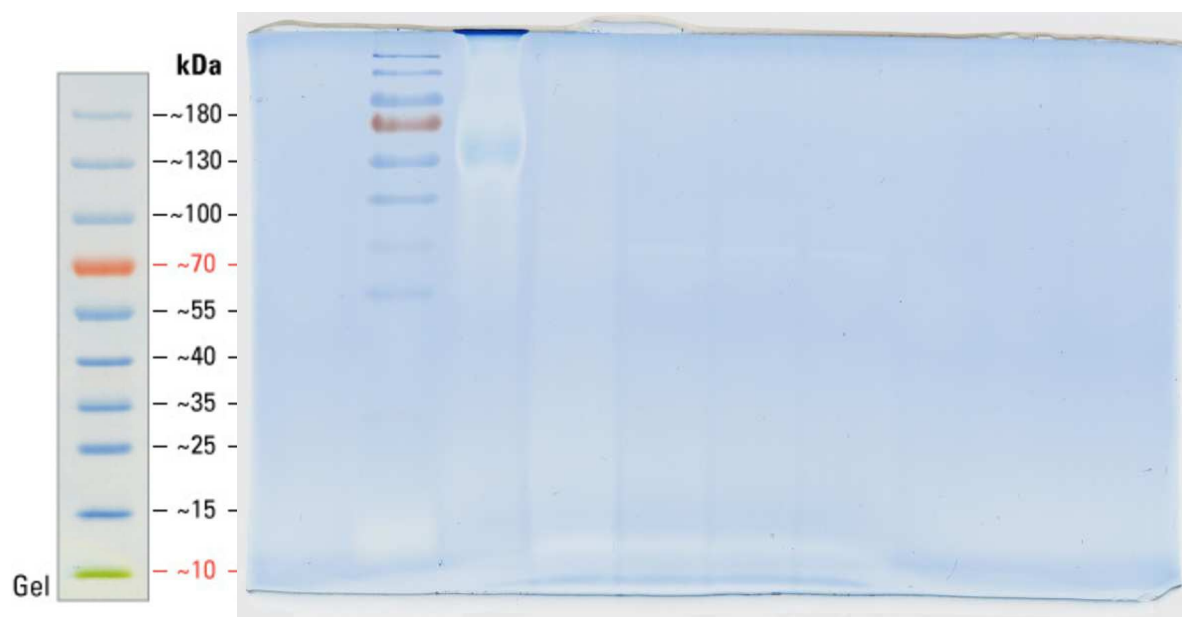

**Figure S-3** SDS-PAGE electropherograms of glycosylated bovine serum albumin, before and after individual steps of enzymatic hydrolysis. Hydrolysis was performed in triplicates. The aliquots (5  $\mu$ g) of all samples were loaded on a gel in 10  $\mu$ L of sample buffer. BH, before hydrolysis; APE, after incubation with Pronase E; APK, after incubation with Proteinase K; AH, after complete hydrolysis; BHS, before hydrolysis in presence of 0.5% (w/v) SDS; APES, after incubation with Pronase E in presence of 0.5% (w/v) SDS; APK, after incubation with Proteinase K in presence of 0.5% (w/v) SDS; AH, after complete hydrolysis in presence of 0.5% (w/v) SDS; St, Page Ruler Prestained Protein Ladder

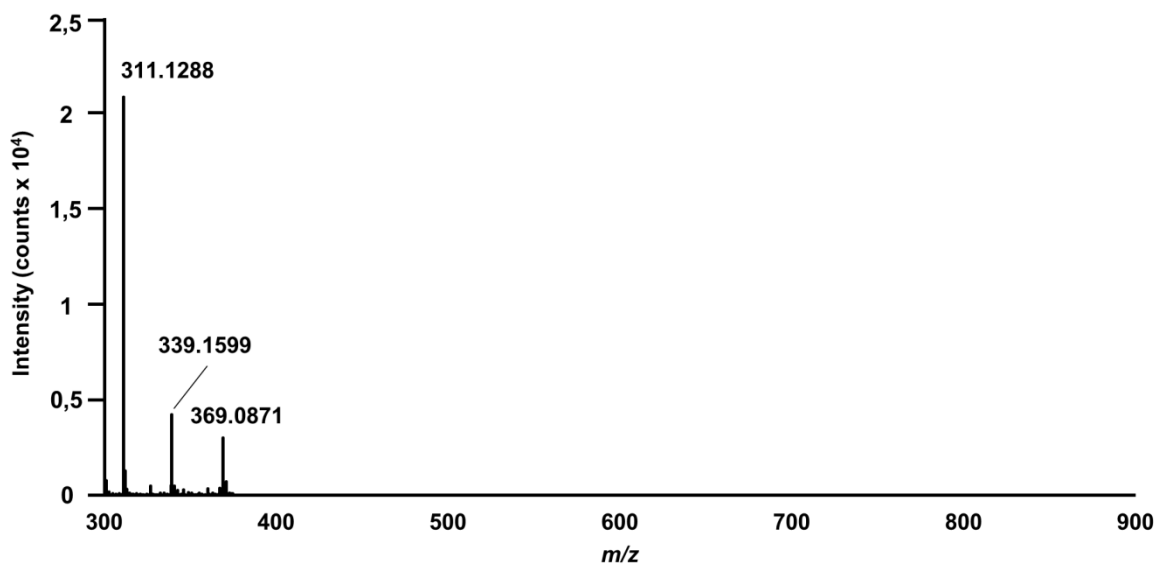

**Figure S-4** ESI-QqTOF mass spectrum, obtained for enzymatic hydrolysate of pea protein.

The spectrum was acquired by a syringe infusion (10  $\mu\text{L}/\text{min}$ ) in a QqTOF-MS (Triple TOF, Sciex, Darmstadt, Germany), operated in positive ion mode. No signals of multiply charged ions could be observed in the spectrum that indicated completeness of hydrolysis.

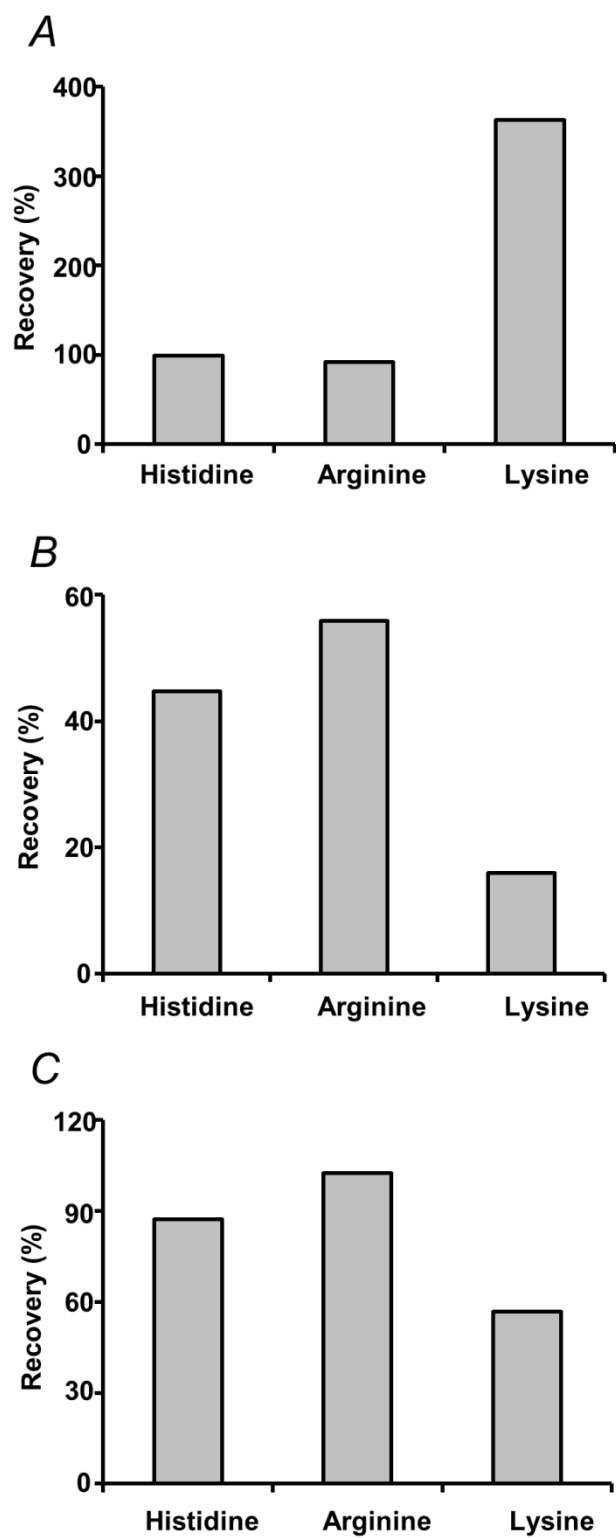

**Figure S-5** Recovery of three basic amino acids from weak anion exchanger CHROMABOND HR-XAW (A), strong anion exchanger CHROMABOND HR-XA (B) and reversed phase CHROMABOND C18 (C) cartridges (according the Protocols S1-1, 2 and 3)

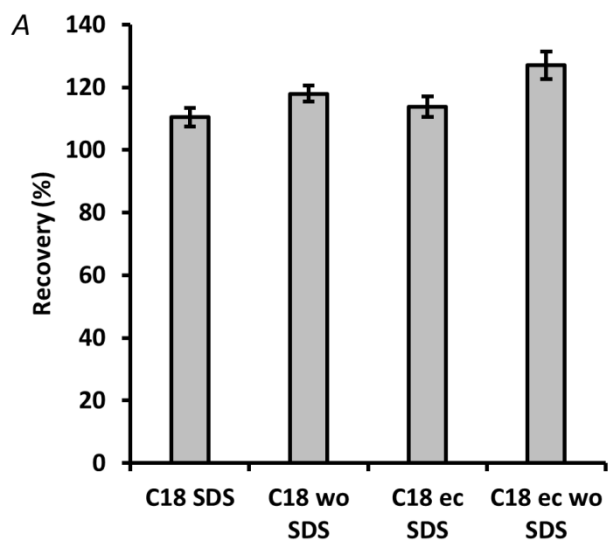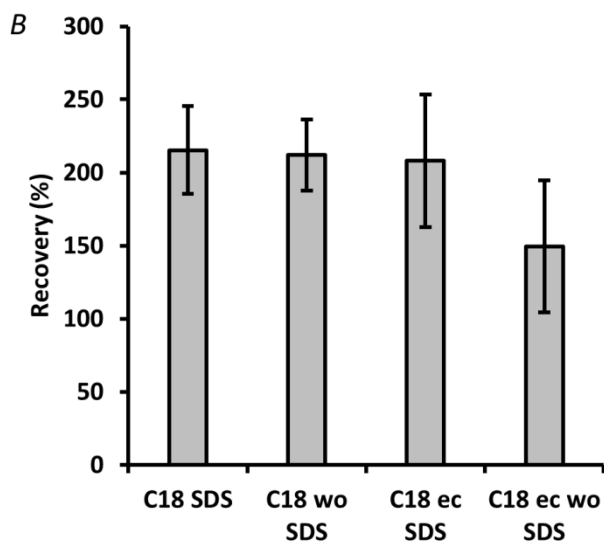

**Figure S-6** Recovery (%) of  $N^\epsilon$ -(carboxymethyl)lysine (CML, A) and lysine (B) from enzymatic hydrolysates obtained with 1 mg/mL glycosylated BSA in presence and absence of 0.5% (w/v) SDS with subsequent SPE on CHROMABOND C18 and C18 ec cartridges. Relative abundances of analytes were obtained by integration of corresponding LC-MS extracted ion chromatograms (XICs) at  $m/z$  485.20 and 427.19 for the L-FDVA derivatives of CML and lysine, respectively, and related to abundances observed without application of SDS and SPE.
